# Supplementary material for: The growth of lithospheric diamonds
Source: PubMed Central journal article supplement — Sci Adv. 2018 Jun 6;4(6):eaat1602. doi: 10.1126/sciadv.aat1602 (PMC5990302; doi:10.1126/sciadv.aat1602), 2018-06-06
Supplement: aat1602_SM.pdf [file aat1602_SM.pdf]

## Supplementary Materials for **The growth of lithospheric diamonds**

Hélène Bureau, Laurent Remusat, Imène Esteve, Daniele L. Pinti, Pierre Cartigny

Published 6 June 2018, *Sci. Adv.* **4**, eaat1602 (2018)

DOI: 10.1126/sciadv.aat1602

### **This PDF file includes:**

- table S1. Isotopic compositions of the starting materials, standards, and samples.
- table S2. Description of the studied samples.
- table S3. Mass balance calculations of isotopic compositions of the bulk composition for the starting materials and the high-pressure and high-temperature carbonate fluid.
- fig. S1. SEM images of the FIB preparation, cut on one side of the seed and on the other side to obtain the final slices.
- fig. S2. Details of the samples analyzed with the NanoSIMS.
- fig. S3. NanoSIMS maps of  $^{12}\text{C}$  for each investigated sample showing the locations of the areas of interest (red squares) corresponding to the location of the measurements reported in table S1 and Fig. 1.
- Reference (33)

**table S1. Isotopic compositions of the starting materials, standards, and samples.** The isotopic compositions of the starting materials were analyzed by gas source mass spectrometry when the samples were measured by NanoSIMS.

| Name                                 | Sample description                           | $\delta^{13}\text{C}$ (uncertainty) |
|--------------------------------------|----------------------------------------------|-------------------------------------|
| <b>Starting Materials</b>            |                                              |                                     |
| MELD                                 | Powder of oxides and carbonates <sup>1</sup> | -11.40 ± 0.1‰ *                     |
| MELD SID                             | Powder MELD + SIDERITE <sup>2</sup>          | -11.38 ± 0.1‰ *                     |
| CaCO <sub>3</sub> ****               | Commercial Synthetic powder                  | -6.65 ± 0.1‰ *                      |
| Na <sub>2</sub> CO <sub>3</sub> **** | Commercial Synthetic powder                  | -4.75 ± 0.1‰ *                      |
| K <sub>2</sub> CO <sub>3</sub> ****  | Commercial Synthetic powder                  | -16.17 ± 0.1‰ *                     |
| (Fe,Mg)CO <sub>3</sub> *****         | Natural Siderite <sup>3</sup>                | -7.60 ± 0.1‰ *                      |
| Graphite                             | Pure graphite powder                         | -26.35 ± 0.1‰ *                     |
| Diamond seeds                        | Powder MSY 20-30µm from Microdiamant         | -30.43 ± 1.35‰ **                   |
| Diamond seeds                        | Powder MSY 20-30µm from Microdiamant         | -29.60 ± 1.36‰ **                   |
| <b>Standards</b>                     |                                              |                                     |
| NIa                                  | Natural diamond Ia                           | -3.6 ± 0.1‰ ***                     |
| SIIa                                 | Synthetic diamond IIa                        | -20.9 ± 0.1‰ ***                    |
| <b>Samples*****</b>                  |                                              |                                     |
| HBD01                                | HBD01-1 TM                                   | -26.33 ± 1.57‰ ***                  |
| HBD01                                | HBD01-2 TM                                   | -27.68 ± 1.46‰ ***                  |
| HBD01                                | HBD01-3 TM                                   | -24.53 ± 1.46‰ ***                  |
| H3908                                | H3908-1 TM                                   | -20.22 ± 1.66‰ ***                  |
| H3908                                | H3908-3 TM                                   | -20.66 ± 1.61‰ ***                  |
| H3908                                | H3908-4 TM                                   | -18.56 ± 1.57‰ ***                  |
| H3908                                | H3908-AREA 2, A: diamond inclusions          | -14.19 ± 3.16‰ ***                  |
| H3913                                | piece of diamond H3913-AREA3 A               | -24.46 ± 2.49‰ ***                  |
| H3913                                | piece of diamond H3913-AREA3 C               | -20.26 ± 3.00‰ ***                  |
| H3913                                | piece of diamond H3913-AREA3 B               | -17.93 ± 4.41‰ ***                  |
| H3913                                | piece of diamond H3913-AREA 2 A              | -27.84 ± 3.13‰ ***                  |
| H3913                                | H3913-1 TM                                   | -20.98 ± 2.55‰ ***                  |

<sup>1</sup> MELD: SiO<sub>2</sub>+Al<sub>2</sub>O<sub>3</sub>+MgO+CaCO<sub>3</sub>+Na<sub>2</sub>CO<sub>3</sub>+K<sub>2</sub>CO<sub>3</sub>+TiO<sub>2</sub> after (8)

<sup>2</sup> 90 wt.% of synthetic powder MELD + 10 wt.% of Natural Siderite SIDB after (9)

TM total Map; A, B, C selected areas of interest

\*Gas source mass spectrometry analysis performed at GEOTOP, UQAM, Montréal

\*\* NanoSIMS analysis after QSA corrections (33)

\*\*\*Gas source mass spectrometry analysis performed at IPGP, Paris.

\*\*\*\* mixed in MELD and in MELD SID

\*\*\*\*\*Maps of 5x5 µm<sup>2</sup>; D diamond ; TM total map ; ROI Region of interest selected in the map

**table S2. Description of the studied samples.**

| Sample  | Starting composition                                                        | Pressure | Temperature | Duration | Size of growth | Minerals in Inclusions                                              |
|---------|-----------------------------------------------------------------------------|----------|-------------|----------|----------------|---------------------------------------------------------------------|
| HBD01*  | 50% MELD*** +<br>50% H <sub>2</sub> O<br>+ G + D                            | 7 GPa    | 1675°C      | 1:30 hrs | Up to<br>10 μm | phengite +<br>coesite +<br>(CaMg)CO <sub>3</sub>                    |
| H3908** | 50% MELD +<br>50% H <sub>2</sub> O-<br>NaCl(10 g/l)<br>+ G + D              | 7 GPa    | 1400°C      | 6:00 hrs | 8-10<br>μm     | D + phengite<br>+<br>(CaMg)CO <sub>3</sub><br>+ coesite +<br>rutile |
| H3913** | 50 % MELD<br>SID**** + 50<br>% H <sub>2</sub> O-<br>NaCl(30 g/l)<br>+ G + D | 7 GPa    | 1400°C      | 6:00 hrs | 4-5<br>μm      | D + olivine +<br>(CaMg)CO <sub>3</sub>                              |

\*from (8);

\*\* from (9); D diamond; the sizes of growth are measured from a few FIB preparations and should be taken as orders of magnitude; minerals trapped as inclusions in diamonds are also present in the solid matrix.

\*\*\* The starting composition “MELD” was derived from the average oxide/carbonate contents of inclusions trapped in metasomatic diamonds (Navon et al., 1988). It was prepared by mixing pure synthetic powders of SiO<sub>2</sub>, Al<sub>2</sub>O<sub>3</sub>, MgO, CaCO<sub>3</sub>, Na<sub>2</sub>CO<sub>3</sub>, K<sub>2</sub>CO<sub>3</sub> and TiO<sub>2</sub>, iron oxide was replaced by magnesium oxide, resulting in the following composition in wt.%: SiO<sub>2</sub> 40.47; Al<sub>2</sub>O<sub>3</sub> 4.36; MgO 21.07; CaO 9.29; Na<sub>2</sub>O 2.36; K<sub>2</sub>O = 17.57; TiO<sub>2</sub> 4.89; plus about 15 wt.% of CO<sub>2</sub>.

\*\*\*\* MELD SID: is a mixture of 90% MELD with 10% natural (Fe,Mg)CO<sub>3</sub>, resulting in the following composition in wt.%: SiO<sub>2</sub> 37.96; Al<sub>2</sub>O<sub>3</sub> 4.09; MgO 20.02; CaO 8.80; Na<sub>2</sub>O 2.21; K<sub>2</sub>O = 16.48; TiO<sub>2</sub> 4.59; FeO 5.12; MnO 0.75; about 17.5 wt.% of CO<sub>2</sub>.

**table S3. Mass balance calculations of isotopic compositions of the bulk composition for the starting materials and the high-pressure and high-temperature carbonate fluid.**

$\delta^{13}\text{C}_{\text{bulk}} = x \delta^{13}\text{C}_{\text{carbonatepowder}} + y\delta^{13}\text{C}_{\text{graphite}}$ , where x, y are weight fractions of both components loaded in the Pt capsules for each experiment, x+y=1, powders are MELD or MELD SID. Uncertainties are calculated from the quadratic sum of analytical errors

| Sample | $\delta^{13}\text{C}$<br>Bulk isotopic composition<br>All carbonates + graphite* | Whole range of $\delta^{13}\text{C}$<br>compositions of the samples<br>including contaminations from<br>the seeds, new diamond areas and<br>inclusions |
|--------|----------------------------------------------------------------------------------|--------------------------------------------------------------------------------------------------------------------------------------------------------|
| HBD01  | $-15.14 \pm 0.14\text{‰}$                                                        | $-27.68 \pm 1.46$ to $-24.53 \pm 1.46\text{‰}$                                                                                                         |
| H3908  | $-16.95 \pm 0.14\text{‰}$                                                        | $-20.66 \pm 1.61$ to $-14.19 \pm 3.16\text{‰}$                                                                                                         |
| H3913  | $-15.49 \pm 0.14\text{‰}$                                                        | $-27.84 \pm 3.13$ to $-17.93 \pm 4.41\text{‰}$                                                                                                         |

\*Calculated following the mass balance:

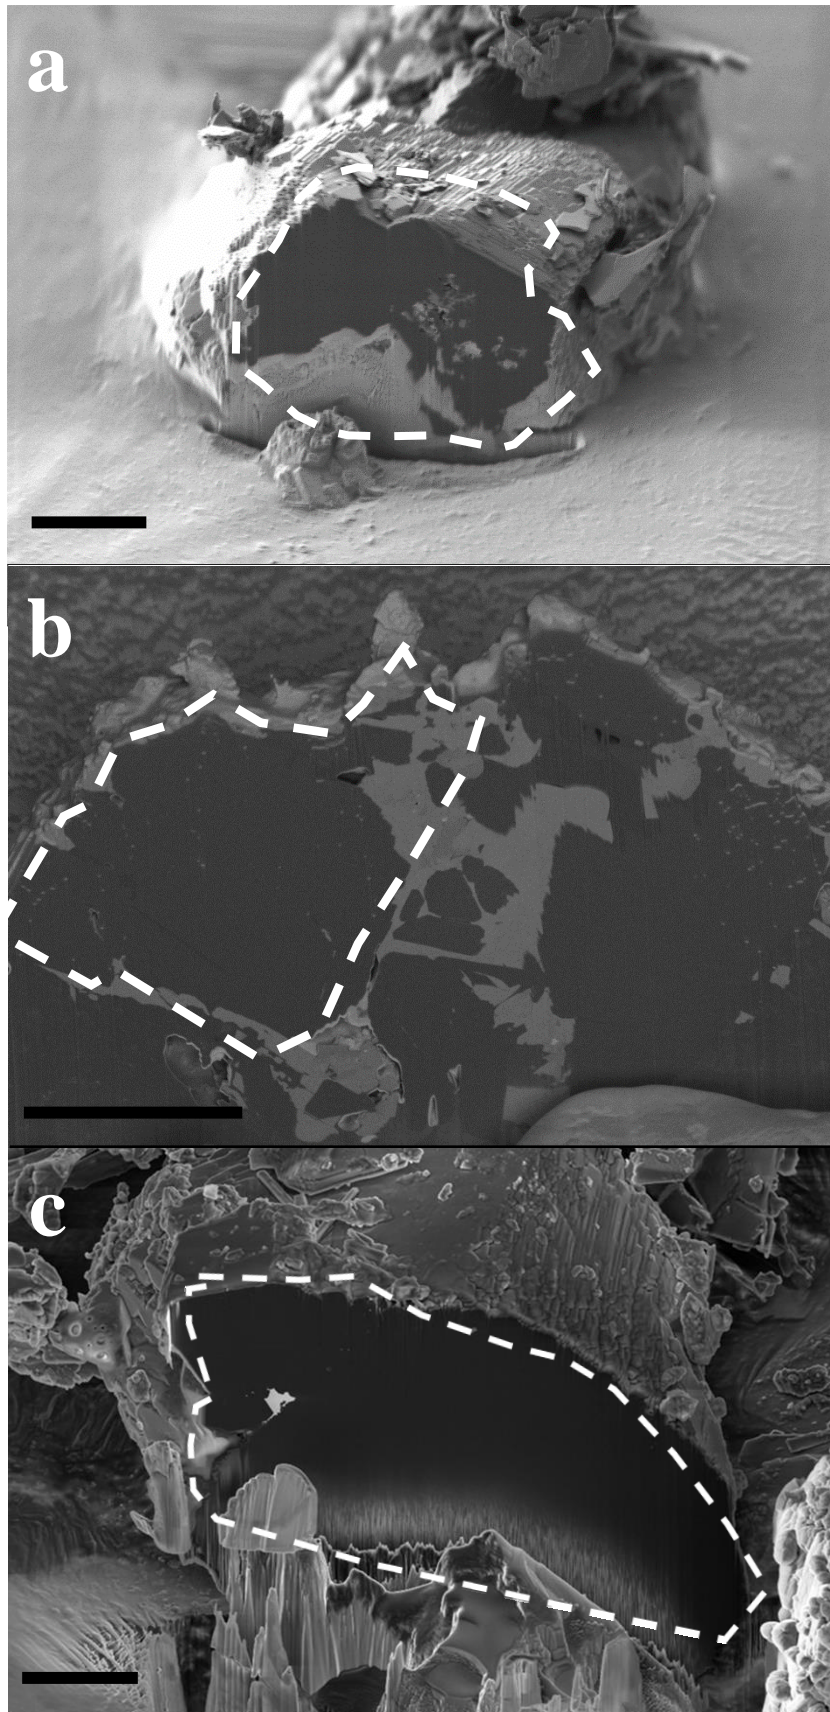

**fig. S1. SEM images of the FIB preparation, cut on one side of the seed and on the other side to obtain the final slices. White dotted lines represent the final slices. Bar scale is 10  $\mu$ m. a: H3908, b: H3913, note that the other face was analyzed, c: HBD01.**

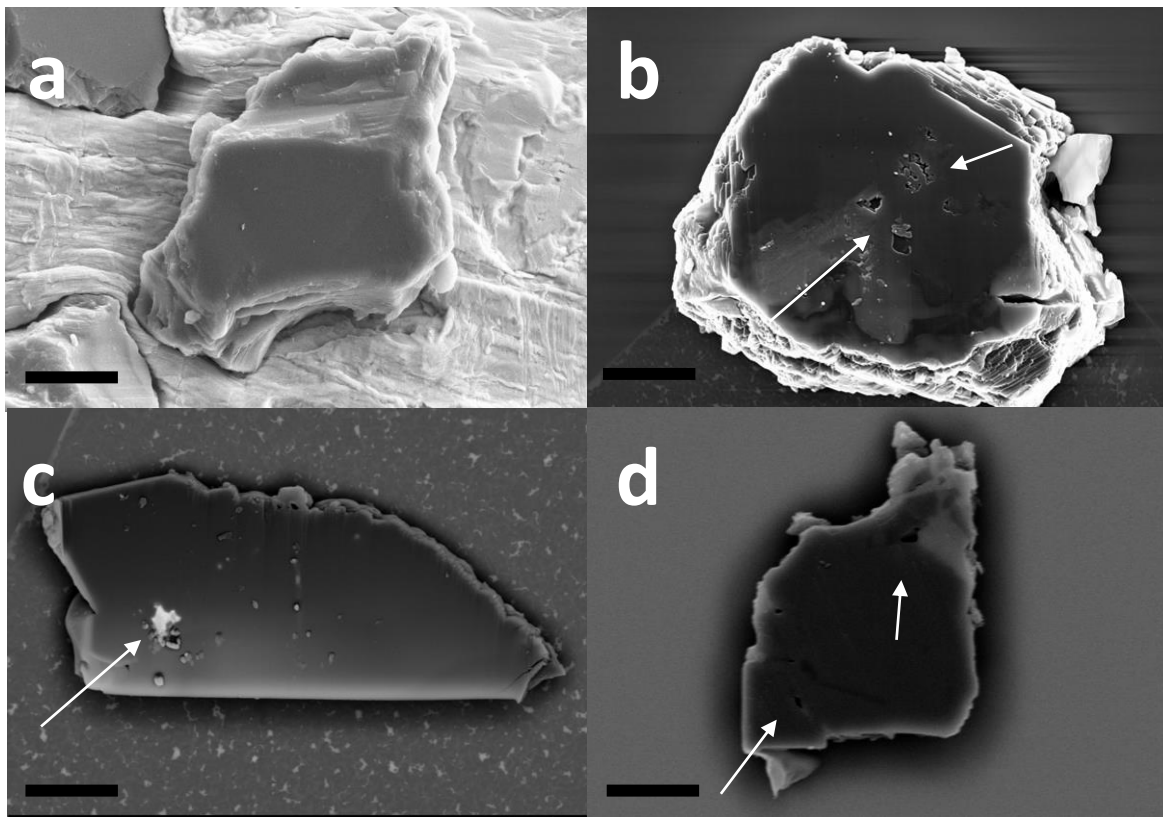

**fig. S2. Details of the samples analyzed with the NanoSIMS.** A. initial diamond seed in Indium plate. FIB thick foils of sample B. H3908, C. HBD01, D. H3913 are placed on silicon wafers. Arrows indicate the position of inclusions trapped during the growth. Bar scale is 10  $\mu\text{m}$ .

# NanoSIMS $^{12}\text{C}$ images

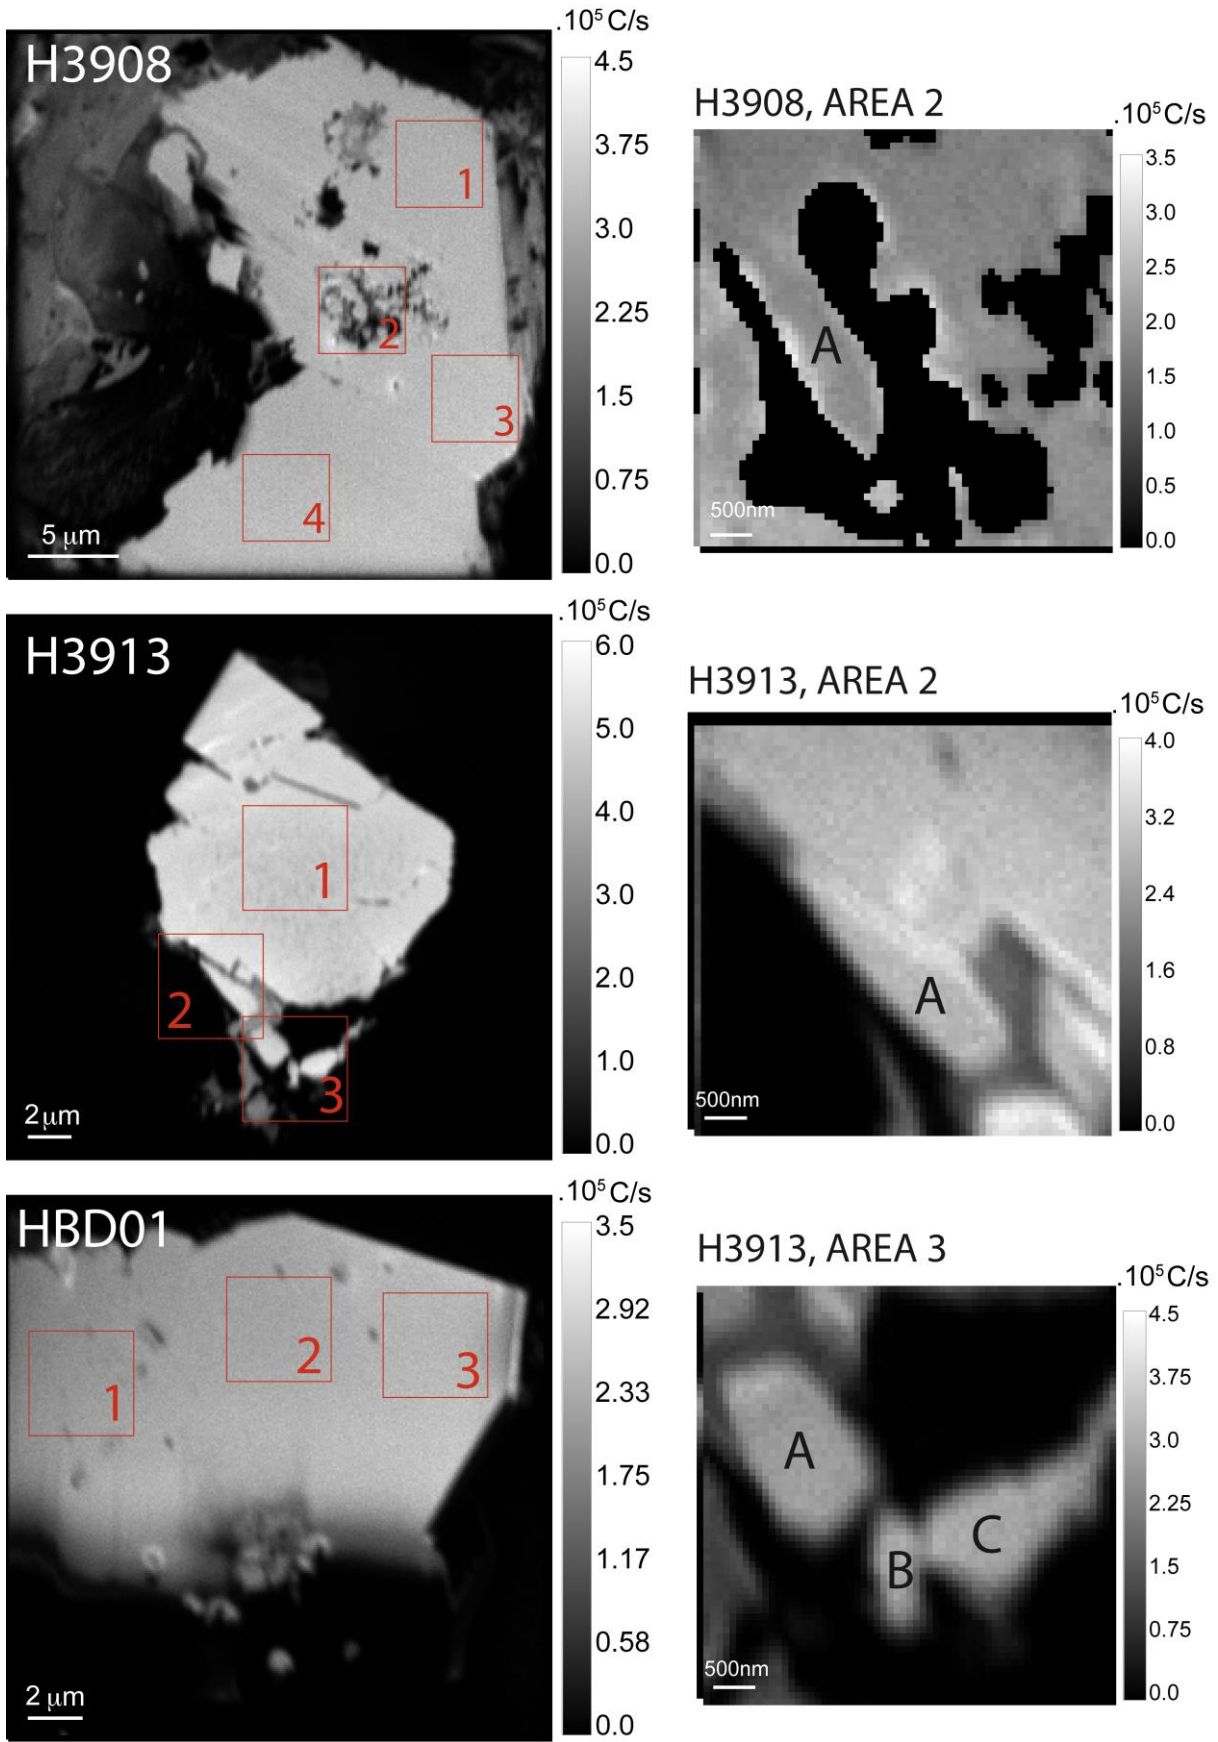

**fig. S3. NanoSIMS maps of  $^{12}\text{C}$  for each investigated sample showing the locations of the areas of interest (red squares) corresponding to the location of the measurements reported in table S1 and Fig. 1.** In some cases, the diamond fragments are smaller than the typical size of areas of interests ( $5 \times 5 \mu\text{m}$ ), and only material corresponding to diamond was selected. In the area 2 of sample H3908, only the selected area A corresponds to the diamond inclusion. Details of the areas 2 and 3 of sample H3913 are shown: area 2 contains 1 diamond fragment, called H3913-AREA2 A in table S1, and area 3 contains 3 fragments, possibly new diamond crystals, called H3913-AREA3 A, B and C in table S1.
